# Supplementary material for: Unraveling the link: exploring the causal relationship between diabetes, multiple sclerosis, migraine, and Alzheimer’s disease through Mendelian randomization
Source: Front Neurosci. 2023 Aug 10;17:1233601. doi: 10.3389/fnins.2023.1233601 (PMC10488716; doi:10.3389/fnins.2023.1233601)
Supplement: Supplementary file 1 [file Table_1.xls]

## Sheet: Sheet1
Instrument variables of T1DM
SNP	effect_allele	other_allele	beta.	pval
rs78037977	G	A	-0.227462	3.25e-10
rs3024505	A	G	-0.176552	4.3e-08
rs2476601	G	A	-0.671466	5.57e-74
rs2111485	G	A	0.155003	1.58e-11
rs231779	T	C	0.187758	7.09e-16
rs13415465	G	T	-0.144031	3.2e-10
rs11938508	A	T	0.144032	3.98e-10
rs112977322	G	A	0.772428	9.28e-16
rs2191035	G	A	0.157893	3.16e-11
rs3132595	G	C	0.625216	8.9e-59
rs4248154	T	C	0.205409	8.07e-12
rs241426	A	T	0.749573	2.06e-194
rs113206908	C	T	1.11532	2.01e-64
rs9266775	G	A	0.867937	1.18e-172
rs150273297	A	T	-0.221729	2.85e-12
rs2523661	A	G	-0.571795	3.38e-94
rs62395847	C	T	-0.890142	3.97e-22
rs58825580	G	T	0.432184	6.39e-47
rs34137317	T	C	-1.88107	1e-11
rs10944479	A	G	0.195587	7.43e-12
rs3130623	T	C	0.99117	1e-200
rs599444	G	A	0.135306	4.63e-08
rs3916365	G	A	-0.455483	1.04e-34
rs1639106	T	C	-0.563486	4.6e-18
rs114393833	G	A	1.26797	3.59e-96
rs16898823	T	A	-0.60792	5.8e-52
rs241452	C	T	-0.716861	7.26e-128
rs28986428	T	C	-1.06776	1.03e-23
rs62405744	A	G	-0.633439	5.49e-13
rs17687635	T	A	-0.20105	1.82e-09
rs116174200	A	G	0.963017	5.05e-25
rs2395163	C	T	0.884355	1e-200
rs6903171	C	G	0.300391	5.08e-19
rs9257316	C	T	0.363532	2.94e-41
rs492899	C	T	0.87904	1.03e-154
rs28746962	A	C	-1.29171	1e-200
rs3130177	A	G	0.396356	3.76e-62
rs114762475	G	A	0.606931	2.25e-24
rs56144236	A	G	-0.593346	2.84e-13
rs114840990	A	T	-0.523562	1.89e-13
rs11756541	A	G	0.477996	1.21e-28
rs17221401	A	G	-0.35803	9.37e-23
rs1794268	C	T	-2.3963	1.51e-29
rs114972028	T	A	-0.458825	1.49e-16
rs76734034	G	A	0.569103	3.59e-13
rs7024686	C	G	-0.131302	3.08e-09
rs12722496	G	A	-0.407803	2.7e-24
rs7122407	G	A	-0.230933	5.02e-11
rs117996750	C	T	-0.537011	2.13e-08
rs1487916	C	T	0.131927	7.41e-09
rs689	T	A	0.813401	2.16e-135
rs4759229	G	A	-0.235657	1.77e-24
rs7310615	G	C	-0.26601	7e-31
rs9600451	A	G	0.133753	5.41e-09
rs927292	G	C	0.149268	5.23e-10
rs2289702	T	C	-0.261465	5.62e-11
rs151233	T	C	0.222076	4e-11
rs4238595	C	T	-0.146226	1.63e-09
rs12927355	T	C	-0.199659	2.1e-17
rs55993634	G	C	0.258682	9e-12
rs144451833	T	C	-0.486288	7.6e-12
rs9911533	T	C	0.126685	3.21e-08
rs7237497	C	T	-0.253723	3.25e-17
rs1790946	T	C	-0.122841	3.1e-08
rs12982646	A	G	0.185982	3.81e-11
rs34725611	G	A	-0.153252	2.64e-09
rs2281808	C	T	0.13141	3.12e-08
rs80054410	C	T	0.164331	2.5e-13
rs4820827	C	T	-0.167344	5.96e-14
