# Supplementary material for: Unraveling the link: exploring the causal relationship between diabetes, multiple sclerosis, migraine, and Alzheimer’s disease through Mendelian randomization
Source: Front Neurosci. 2023 Aug 10;17:1233601. doi: 10.3389/fnins.2023.1233601 (PMC10488716; doi:10.3389/fnins.2023.1233601)
Supplement: Supplementary file 2 [file Table_2.xls]

## Sheet: Sheet1
Instrument variables of T2DM
SNP	effect_allele	other_allele.	pval.	beta.
rs16826069	G	A	8.86339e-11	0.055
rs340874	C	T	1.09295e-12	0.05
rs2943641	C	T	1.59698e-15	0.0589
rs243021	A	G	6.3314e-12	0.0483
rs35720761	T	C	1.14288e-12	-0.0729
rs13389219	T	C	6.11364e-21	-0.0656
rs1260326	C	T	1.04304e-15	0.0569
rs11708067	G	A	1.02589e-20	-0.0777
rs7651090	G	A	3.93459e-33	0.0909
rs1801282	G	C	4.81282e-12	-0.0736
rs6795735	T	C	7.95298e-09	-0.0419
rs6813195	T	C	1.277e-08	-0.0432
rs1801212	A	G	6.68036e-20	0.0687
rs4457053	A	G	2.92685e-11	-0.0454
rs2112347	G	T	1.78608e-14	-0.0563
rs459193	G	A	3.72898e-10	0.0529
rs35658696	G	A	5.88437e-12	0.1189
rs9379084	A	G	1.60103e-12	-0.0935
rs1077394	T	C	1.00902e-11	0.052
rs2191349	T	G	6.28492e-16	0.0526
rs864745	C	T	2.22587e-19	-0.0632
rs4607517	A	G	1.87499e-10	0.0578
rs13266634	T	C	5.54753e-30	-0.0831
rs516946	C	T	2.59717e-17	0.0709
rs10758593	A	G	6.46398e-09	0.0409
rs60980157	T	C	4.7852e-15	-0.0666
rs10965250	A	G	4.87416e-30	-0.1173
rs12571751	G	A	1.74783e-20	-0.062
rs7903146	T	C	1e-200	0.2367
rs5015480	T	C	2.09701e-26	-0.0796
rs10830963	G	C	8.85319e-28	0.0887
rs2237895	C	A	4.8095e-25	0.074
rs11603334	A	G	4.09355e-12	-0.0645
rs5215	T	C	3.75664e-17	-0.0616
rs55834942	A	G	1.16799e-10	-0.0571
rs11063069	G	A	9.34394e-09	0.0468
rs1727307	G	A	2.231e-08	0.0406
rs10842994	T	C	3.90841e-12	-0.0626
rs1359790	A	G	2.75613e-11	-0.0542
rs10146997	G	A	5.325e-10	0.0516
rs7177055	A	G	2.42103e-13	0.0608
rs8042680	A	C	5.70598e-09	0.0464
rs1364063	C	T	2.46502e-08	-0.0402
rs7202877	G	T	8.17523e-13	-0.0843
rs781852	G	A	9.11801e-11	0.049
rs4430796	A	G	1.31795e-18	-0.0612
rs12602912	T	C	1.11699e-08	0.0489
rs17782313	C	T	1.64399e-08	0.0499
rs8108269	G	T	7.20444e-11	0.052
rs4805885	C	T	4.51898e-08	-0.0384
rs769449	A	G	3.21004e-09	-0.0573
rs58542926	T	C	1.67402e-10	0.0822
rs41278853	G	A	4.00313e-11	-0.0847
