# Supplementary material for: Unraveling the link: exploring the causal relationship between diabetes, multiple sclerosis, migraine, and Alzheimer’s disease through Mendelian randomization
Source: Front Neurosci. 2023 Aug 10;17:1233601. doi: 10.3389/fnins.2023.1233601 (PMC10488716; doi:10.3389/fnins.2023.1233601)
Supplement: Supplementary file 3 [file Table_3.xls]

## Sheet: Sheet1
Instrument variables of MS
SNP	effect_allele.	other_allele.	pval.	beta.
rs12133753	T	C	1.91602e-08	-0.124781
rs12047318	A	G	1.51391e-11	-0.614483
rs10801908	T	C	3.53671e-16	-0.21495
rs2760522	G	C	1.516e-08	0.124339
rs59655222	C	T	3.75837e-11	-0.123191
rs74449127	G	A	1.36113e-14	-0.196964
rs6670198	C	T	2.02908e-16	-0.145026
rs483180	G	C	1.76999e-09	-0.108254
rs2317231	T	G	1.902e-09	-0.100569
rs35486093	G	A	1.59901e-10	0.179486
rs11809700	T	C	3.5051e-15	0.144448
rs35540610	C	T	2.87872e-12	0.135143
rs1177228	G	A	8.56702e-09	0.107418
rs7592560	A	G	2.87402e-10	0.10409
rs12478539	C	G	4.36616e-11	-0.123191
rs12612620	A	G	4.255e-09	0.211833
rs1014486	C	T	1.36399e-10	0.10508
rs10936602	C	T	1.67699e-08	-0.108406
rs9843355	A	G	4.72498e-10	-0.133831
rs2681424	C	T	2.70707e-13	-0.121155
rs13327021	T	C	1.72703e-11	0.115186
rs4325907	T	C	3.68197e-09	-0.099268
rs13075144	C	T	2.66299e-09	0.135143
rs438613	C	T	9.43409e-17	0.138021
rs9992763	T	G	4.51398e-08	-0.0900341
rs10063294	A	G	1.13e-09	-0.0990472
rs11749040	A	G	3.53997e-17	0.196745
rs2546890	G	A	1.03896e-12	-0.116983
rs2975047	A	G	6.38999e-83	-0.411845
rs1974459	A	C	1e-200	-1.08975
rs12525643	G	A	9.84464e-12	0.12262
rs72928038	A	G	9.00949e-11	0.160521
rs4711234	G	A	4.30101e-09	-0.132256
rs2857700	C	T	1e-200	-0.767224
rs41284712	T	G	1e-200	-1.79396
rs1738074	C	T	9.90832e-12	0.113729
rs802730	C	T	3.23601e-10	-0.11431
rs4896153	A	T	1.64589e-13	-0.138343
rs6903655	T	C	5.81393e-09	0.1207
rs17207085	A	C	1.75186e-15	-0.740031
rs2736197	T	G	2.29499e-10	-0.456095
rs2213307	T	A	4.77749e-22	-0.168655
rs62420820	A	G	2.49574e-13	0.137237
rs17200698	T	C	5.50605e-09	-0.248187
rs6924352	T	G	4.83059e-61	-0.375349
rs9405064	C	A	1.79515e-19	-0.263705
rs28752924	C	T	6.49531e-43	-0.385194
rs12196740	T	C	1.78813e-16	-0.423436
rs145458341	T	G	1.54597e-42	-2.30374
rs72851025	C	T	1e-200	-2.11114
rs28746997	T	C	5.09918e-79	-0.476731
rs111718686	C	T	2.20699e-60	-0.632176
rs206776	C	T	3.78966e-12	-0.121829
rs354033	A	G	1.20501e-08	-0.107957
rs55970742	T	C	2.04998e-08	-0.100373
rs6990534	G	A	3.597e-09	0.10714
rs28703878	G	A	4.50703e-10	0.133646
rs7855251	C	T	4.23302e-08	-0.110109
rs1250551	T	G	2.66195e-11	0.115748
rs1112718	G	A	2.46297e-10	-0.10562
rs11256593	T	C	6.78266e-27	0.186314
rs35335304	G	C	3.20701e-08	0.133044
rs56232455	A	G	1.77701e-08	0.15841
rs12365699	A	G	3.14601e-10	-0.143754
rs4939490	G	C	4.24717e-15	0.136627
rs701006	G	A	1.34896e-11	0.113864
rs7975763	T	C	7.80405e-09	0.121038
rs1860545	A	G	7.78753e-12	0.116534
rs9591325	C	T	4.15604e-10	-0.212366
rs17124032	A	G	7.08109e-12	-0.216803
rs12147246	G	A	4.29398e-09	-0.0993784
rs34695601	C	T	3.16497e-08	-0.109482
rs12434551	T	A	1.82802e-10	-0.103909
rs6496663	C	A	2.77799e-08	0.100594
rs35703946	A	G	1.93798e-09	-0.172524
rs3809627	A	C	3.24601e-08	-0.0969515
rs7190580	G	A	4.64301e-08	-0.0980337
rs415759	C	T	4.76497e-08	0.118784
rs7200146	T	G	7.00164e-24	-0.170788
rs12925972	C	T	3.07298e-08	0.0945826
rs1026916	G	A	1.02e-13	-0.129653
rs2150879	A	G	3.28897e-10	-0.103549
rs7222450	A	G	1.77902e-08	0.0983963
rs11079784	C	T	4.33511e-11	0.107149
rs9955954	G	A	1.539e-08	-0.110038
rs1077667	T	C	8.37336e-13	-0.151862
rs28834106	C	T	3.78966e-11	-0.12936
rs8102445	T	G	4.15403e-09	-0.10075
rs4808760	G	C	4.84061e-13	-0.13456
rs6032662	T	C	2.84512e-13	-0.133831
rs2248137	G	C	7.80728e-11	-0.11205
rs140522	C	T	2.848e-10	-0.110596
