# Supplementary material for: Unraveling the link: exploring the causal relationship between diabetes, multiple sclerosis, migraine, and Alzheimer’s disease through Mendelian randomization
Source: Front Neurosci. 2023 Aug 10;17:1233601. doi: 10.3389/fnins.2023.1233601 (PMC10488716; doi:10.3389/fnins.2023.1233601)
Supplement: Supplementary file 4 [file Table_4.xls]

## Sheet: Sheet1
Instrument variables of migraine
SNP	effect_allele	other_allele.	beta.	pval.
rs12134493	A	C	0.00419863	5.75175e-11
rs10218452	G	A	0.00474445	5.52459e-22
rs10908505	A	T	-0.00249425	8.61787e-09
rs10166942	C	T	-0.0035928	4.80839e-12
rs9349379	G	A	-0.00317523	3.82825e-14
rs9486715	C	A	0.00358299	4.88765e-16
rs12532479	C	T	0.0043299	1.29205e-10
rs12344007	C	T	0.00354078	3.05696e-08
rs34499708	A	G	0.00334788	7.84874e-12
rs7104488	T	C	0.00258966	4.26884e-10
rs11172113	C	T	-0.00411454	7.85959e-23
rs3827986	A	G	0.00258104	4.8935e-08
